# Supplementary material for: A novel borate phosphor Lu5Ba6B9O27:Ce3+ codoped with Sr2+/Tb3+ for NUV-white light emitting diode application
Source: Royal Society of Chemistry journal article supplement (doi:10.1039/d4dt01843e), 2024-01-01
Supplement: d4dt01843e1.pdf [file d4dt01843e1.pdf]

**Novel borate phosphors  $\text{Lu}_5\text{Ba}_6\text{B}_9\text{O}_{27}:\text{Ce}^{3+}$  codoping  $\text{Sr}^{2+}/\text{Tb}^{3+}$  for NUV-white light emitting diodes application**

Chenggang Ma,<sup>a</sup> Hailiang Chen,<sup>b</sup> Min Luo,<sup>a</sup> Fuyun Duan,<sup>b</sup> Yun Ding,<sup>a</sup> Yihang Han,<sup>c</sup> Tianxiang Zheng,<sup>a</sup> Xun Yang,<sup>d</sup> Yu Xiao\*<sup>a</sup>

a. College of Science, Nanjing Forestry University, Nanjing 210037, P. R. China.

b. Shandong INOV Polyurethane CO., Ltd, Zibo 255000, P. R. China.

c. College of Chemistry and Molecular Engineering, Peking University, Beijing 100871, P. R. China.

d. College of Materials Science and Engineering, Nanjing Forestry University, Nanjing 210037, P. R. China.

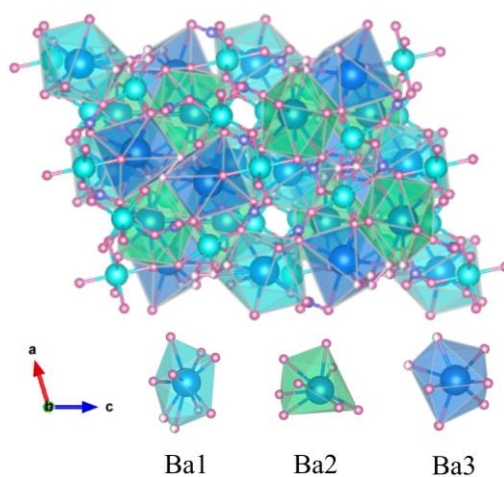

Fig S1. Crystal structure of LBB and the crystallographically independent cation coordination environment of Ba1, Ba2 and Ba3.

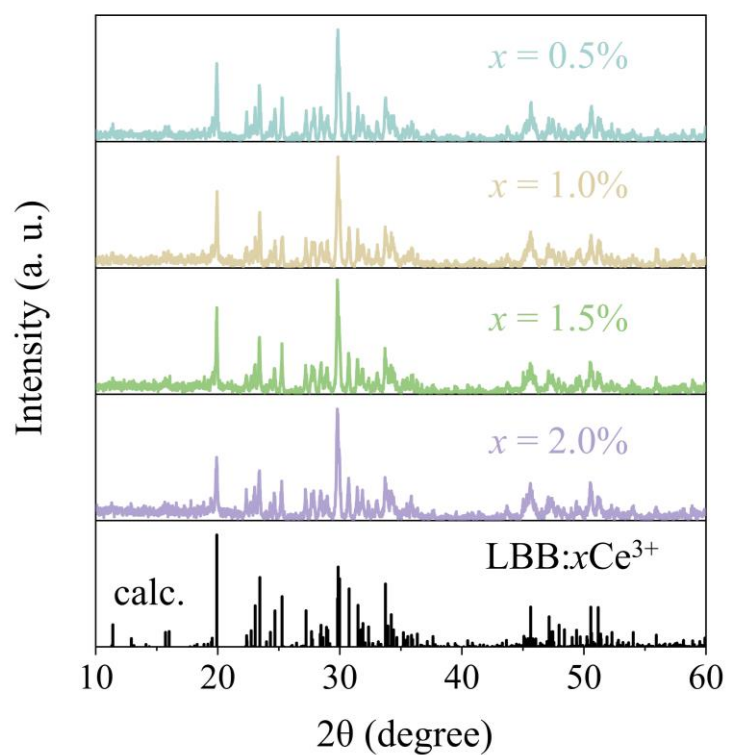

Fig S2. XRD patterns of LBB: $x\text{Ce}^{3+}$  ( $x = 0.5\%$ ,  $1.0\%$ ,  $1.5\%$ , and  $2.0\%$ ) phosphors.

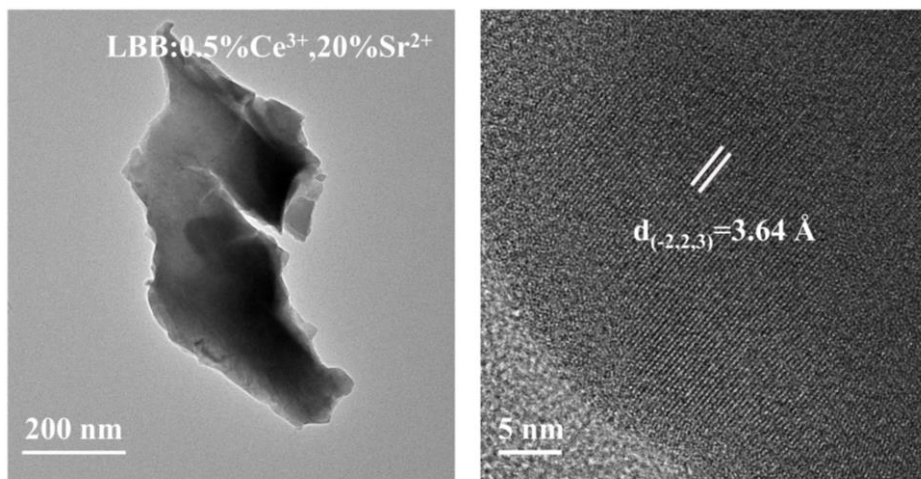

Fig S3. HRTEM image of LBB:0.5%Ce<sup>3+</sup>,20%Sr<sup>2+</sup>.

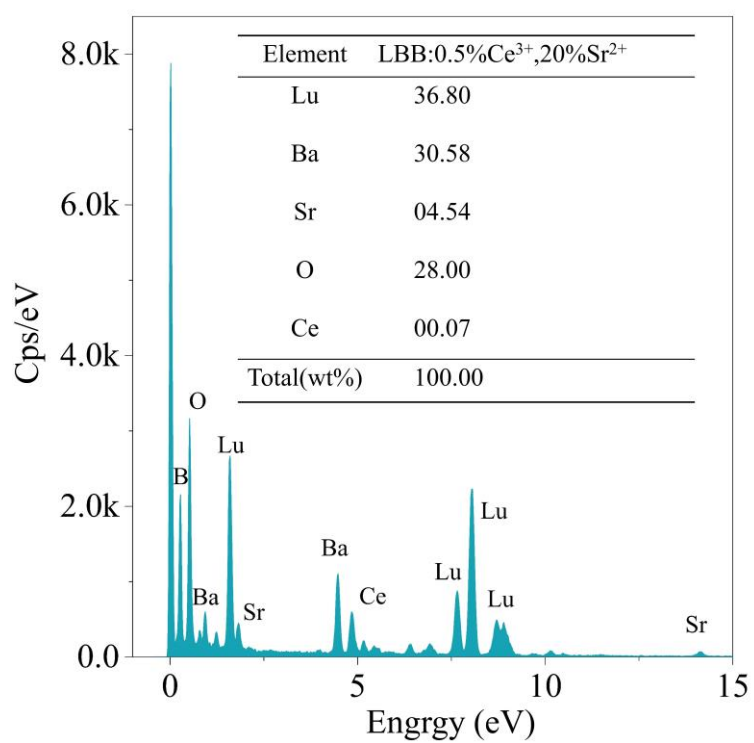

Fig. S4 EDS spectrum of LBB:0.5%Ce<sup>3+</sup>,20%Sr<sup>2+</sup>.

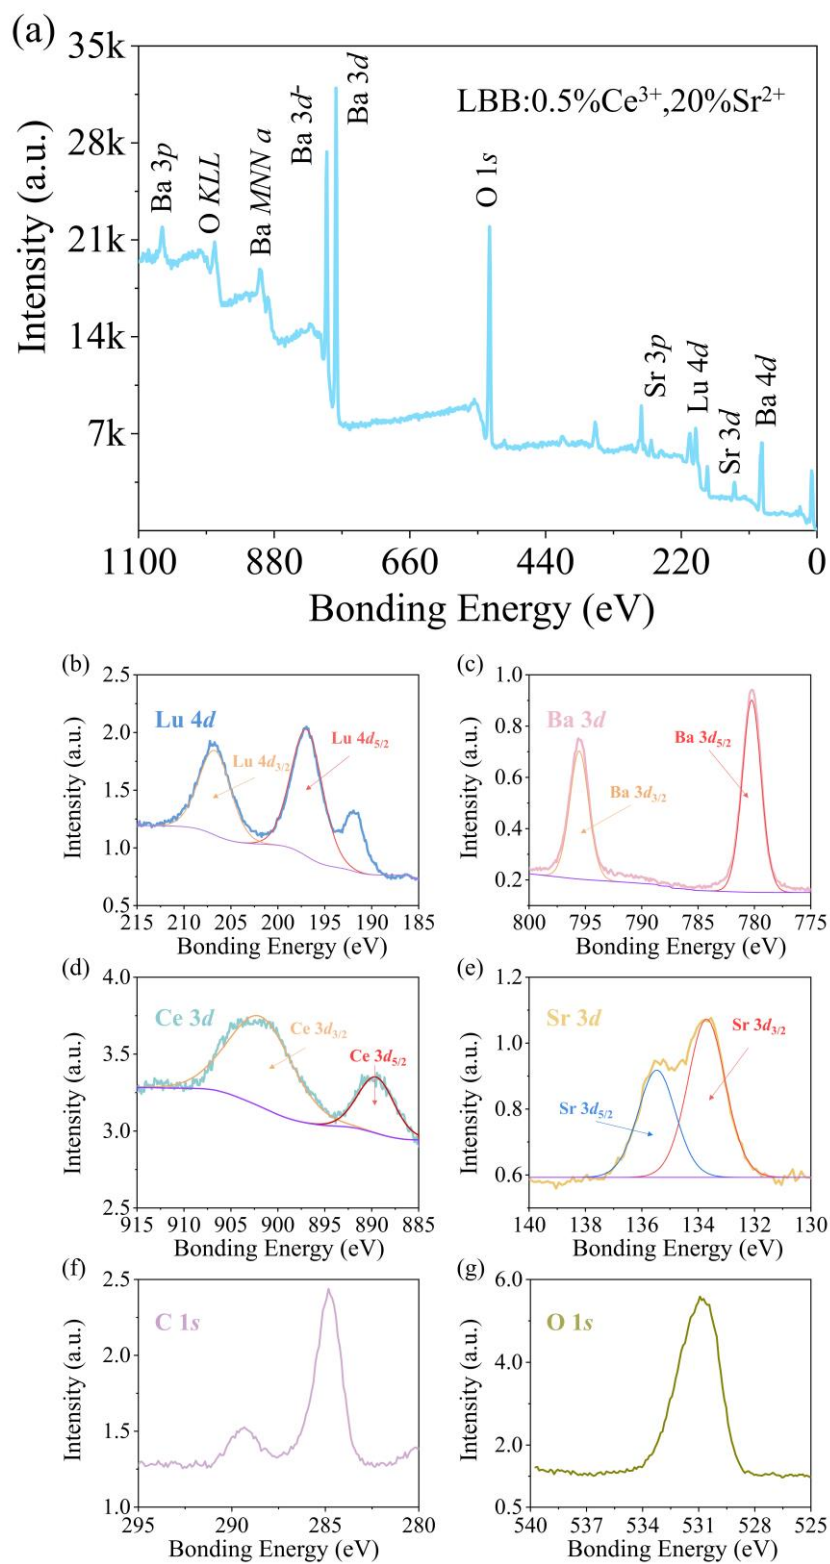

Fig. S5 XPS spectra of LBB:0.5%Ce<sup>3+</sup>,20%Sr<sup>2+</sup>.

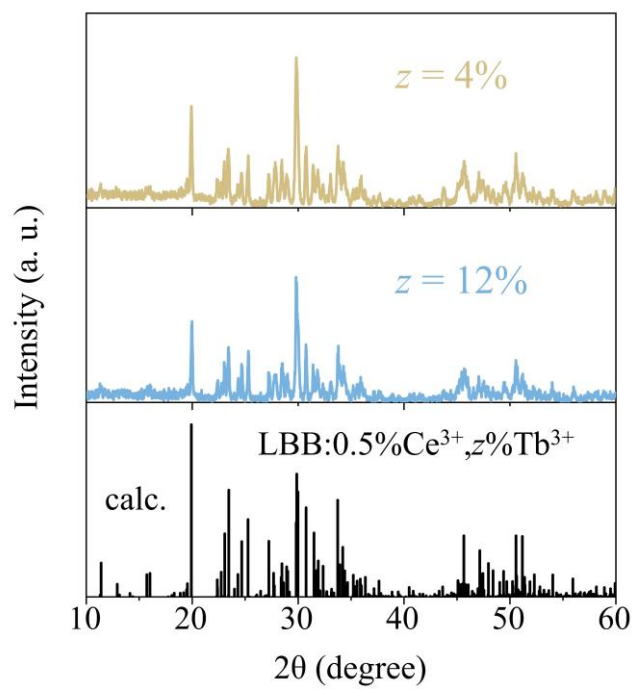

Fig. S6 XRD patterns of  $\text{LBB:}0.5\%\text{Ce}^{3+}, z\text{Tb}^{3+}$  ( $z = 4\%$  and  $12\%$ )

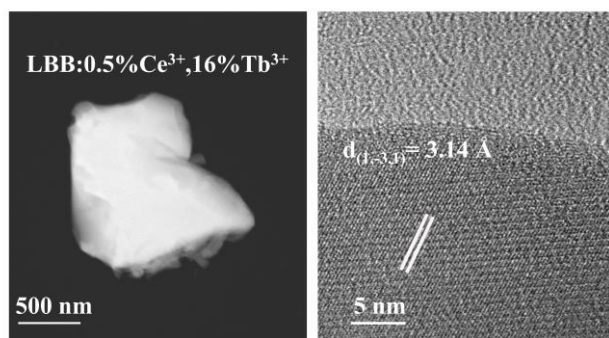

Fig S7. HRTEM image of  $\text{LBB:}0.5\%\text{Ce}^{3+}, 16\%\text{Tb}^{3+}$

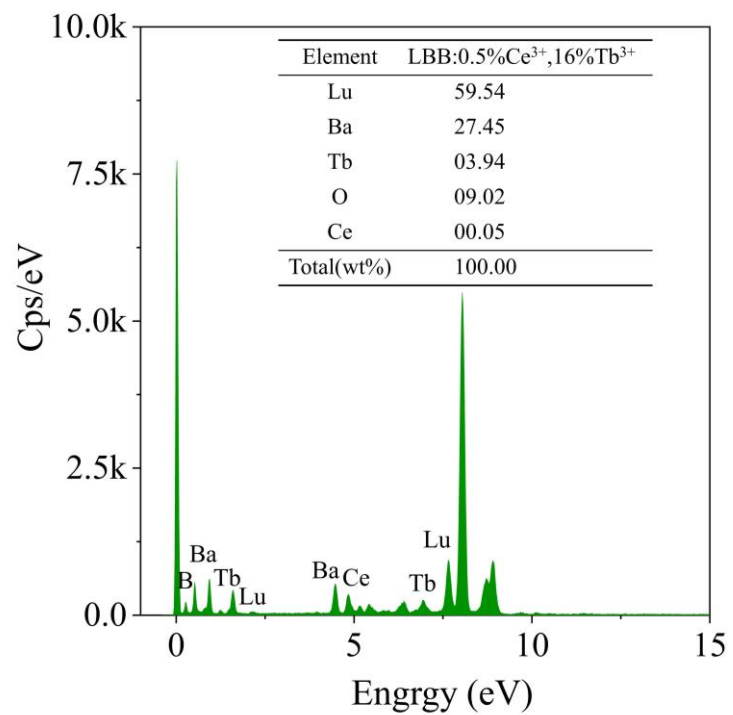

Fig. S8 EDS spectrum of LBB:0.5%Ce<sup>3+</sup>,16%Tb<sup>3+</sup>

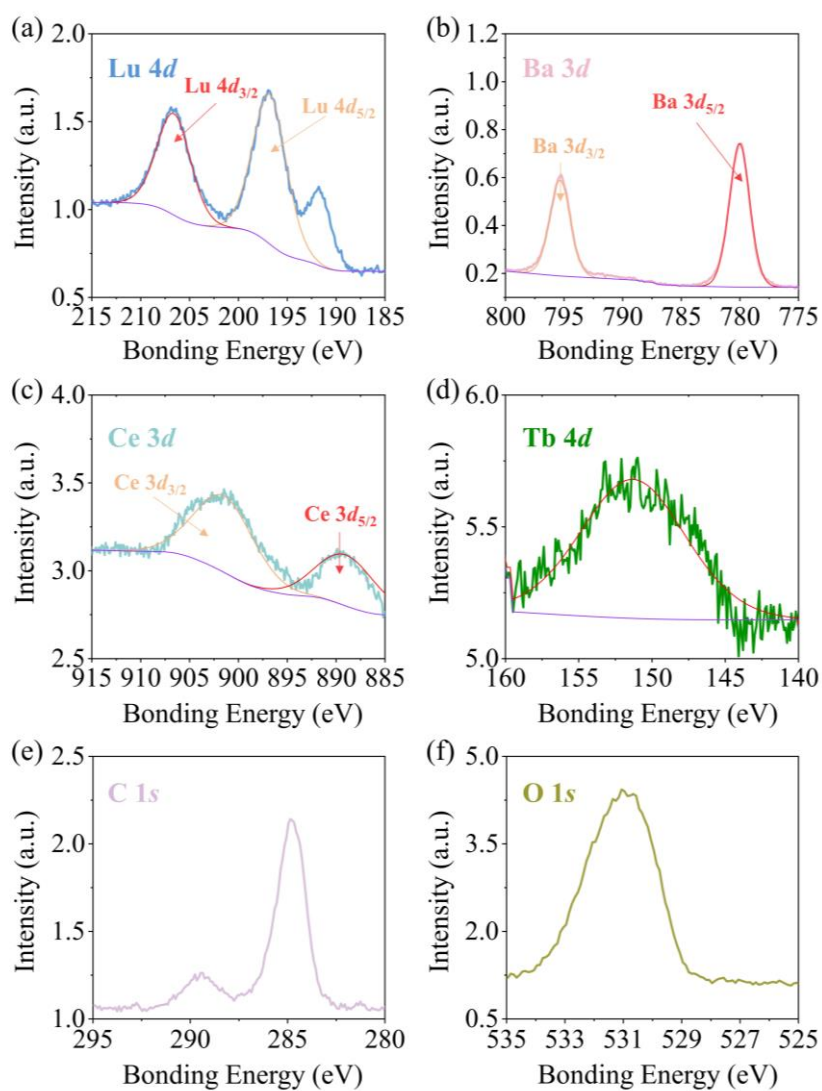

Fig S9. XPS spectra of LBB:0.5%Ce<sup>3+</sup>,16%Tb<sup>3+</sup>

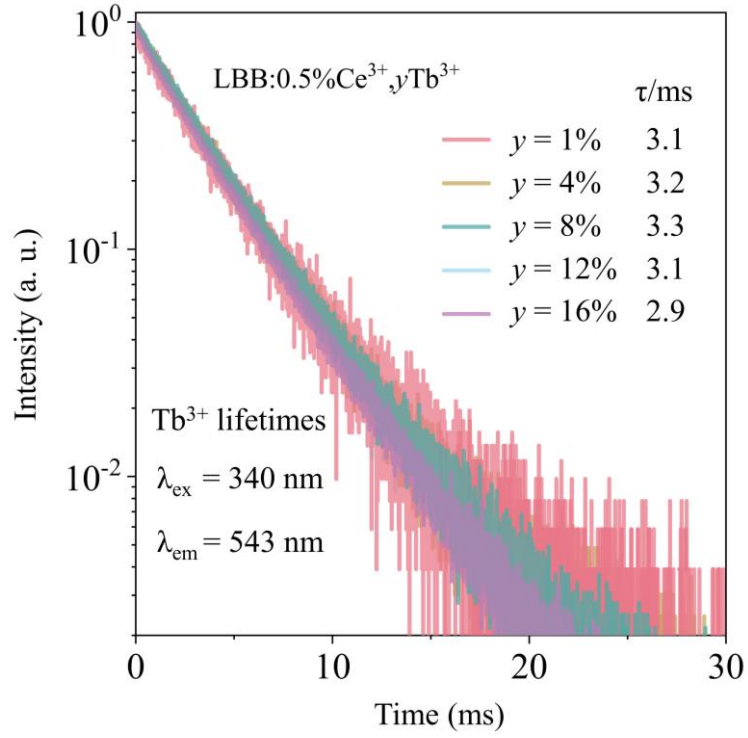

Fig S10. Fluorescence decay curves of Tb<sup>3+</sup> in LBB:0.5%Ce<sup>3+</sup>,zTb<sup>3+</sup> (0% ≤ z ≤ 16%)

Table S1. The energy transfer efficiency ( $\eta_T$ ) results of LBB:0.5%Ce<sup>3+</sup>,zTb<sup>3+</sup> (0% ≤ z ≤ 16%) using Eqs. (7) and (8):

| LBB: 0.5%Ce <sup>3+</sup> ,z%Tb <sup>3+</sup> | $\eta_{ET} = 1 - \frac{I_S}{I_{S0}}$ | $\eta_{ET} = 1 - \frac{\tau_S}{\tau_{S0}}$ |
|-----------------------------------------------|--------------------------------------|--------------------------------------------|
| z = 1%                                        | 10.3%                                | 8.1%                                       |
| z = 4%                                        | 35.8%                                | 9.4%                                       |
| z = 8%                                        | 51.1%                                | 16.2%                                      |
| z = 12%                                       | 67.0%                                | 30.2%                                      |
| z = 16%                                       | 77.2%                                | 39.6%                                      |



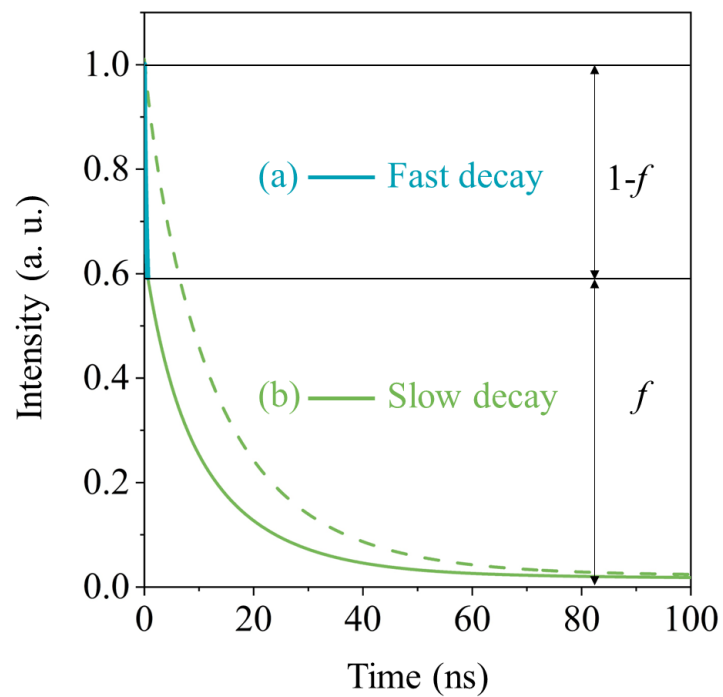

Fig S11. Schematic diagram for the fast (a); and slow (b) decay curves.
